# Supplementary material
Source: PubMed Central journal article supplement (PMC4613950)
Supplement: supp_115.065920_Supplemental_65920.pdf [file supp_115.065920_Supplemental_65920.pdf]

Supplemental data for

**Drug Metabolism and Disposition**

**Physiologically Based Pharmacokinetic (PBPK) Modeling and Simulation Approaches: A systematic review of published models, applications and model verification**

Jennifer E. Sager, Jingjing Yu, Isabelle Ragueneau-Majlessi, Nina Isoherranen

Department of Pharmaceutics, School of Pharmacy, University of Washington, Seattle, WA, USA (J.E.S., I.R., J.Y., N.I.)

**Supplemental Table 1: Pharmaceutical agents classified as in vivo P450 substrates, inhibitors, and inducers in the FDA and EMA drug-interaction guidance**

| Enzyme  | Sensitive Substrates                                                                                                        | NTI <sup>a</sup> Substrates                                 | Inhibitors                                                                                                                                                                                                                                                                                                                                                                                                                                  | Inducers                                                                                       |
|---------|-----------------------------------------------------------------------------------------------------------------------------|-------------------------------------------------------------|---------------------------------------------------------------------------------------------------------------------------------------------------------------------------------------------------------------------------------------------------------------------------------------------------------------------------------------------------------------------------------------------------------------------------------------------|------------------------------------------------------------------------------------------------|
| CYP1A2  | alosetron, <b>caffeine*</b> , duloxetine, melatonin, ramelteon, tacrine, tizanidine                                         | <b>Theophylline*</b> , tizanidine                           | <b>Strong:</b> ciprofloxacin, enoxacin*, fluvoxamine<br><b>Moderate:</b> methoxsalen, mexiletine, phenylpropanolamine, thiabendazole, vemurafenib, zileuton<br><b>Weak:</b> acyclovir, allopurinol, caffeine, cimetidine, daidzein, disulfiram, famotidine, norfloxacin, propafenone, propranolol, terbinafine, ticlopidine, verapamil                                                                                                      | <b>Moderate:</b> montelukast, phenytoin<br><b>Weak:</b> moricizine, omeprazole, phenobarbital, |
| CYP2B6  | bupropion*, <b>efavirenz*</b>                                                                                               |                                                             | <b>Weak:</b> clopidogrel, ticlopidine*, prasugrel                                                                                                                                                                                                                                                                                                                                                                                           | <b>Moderate:</b> <b>efavirenz</b> , rifampin<br><b>Weak:</b> nevirapine                        |
| CYP2C8  | <i>amodiaquine</i> , <b>repaglinide*</b>                                                                                    | paclitaxel                                                  | <b>Strong:</b> <b>gemfibrozil*</b><br><b>Weak:</b> fluvoxamine, ketoconazole, <b>trimethoprim</b>                                                                                                                                                                                                                                                                                                                                           | Moderate: rifampin                                                                             |
| CYP2C9  | celecoxib                                                                                                                   | <b>phenytoin</b> , S- <b>warfarin*</b> , <i>tolbutamide</i> | <b>Moderate:</b> <b>amiodarone</b> , fluconazole*, miconazole, oxandrolone<br><b>Weak:</b> capecitabine, cotrimoxazole, etravirine, fluvastatin, fluvoxamine, metronidazole, sulfapyrazone, tigecycline, voriconazole, zafirlukast                                                                                                                                                                                                          | <b>Moderate:</b> carbamazepine, rifampin<br><b>Weak:</b> aprepitant, bosentan, phenobarbital   |
| CYP2C19 | <b>clobazam</b> , lansoprazole, <b>omeprazole*</b> , S-mephenytoin                                                          | S-mephenytoin                                               | <b>Strong:</b> fluconazole, fluvoxamine, ticlopidine<br><b>Moderate:</b> <b>esomeprazole</b> , fluoxetine, moclobemide, omeprazole*, voriconazole<br><b>Weak:</b> armodafinil, carbamazepine, cimetidine, etravirine, human growth hormone (rhGH), felbamate, ketoconazole                                                                                                                                                                  | <b>Moderate:</b> rifampin<br><b>Weak:</b> artemisinin                                          |
| CYP2D6  | atomoxetine, desipramine*, <b>dextromethorphan</b> , <b>metoprolol*</b> , nebivolol, perphenazine, tolterodine, venlafaxine | thioridazine, pimozone                                      | <b>Strong:</b> bupropion, <b>fluoxetine*</b> , <b>paroxetine*</b> , quinidine*<br><b>Moderate:</b> cinacalcet, duloxetine, terbinafine<br><b>Weak:</b> amiodarone, celecoxib, clobazam, cimetidine, desvenlafaxine, diltiazem, diphenhydramine, escitalopram, febuxostat, gefitinib, hydralazine, hydroxychloroquine, imatinib, methadone, pazopanib, propafenone, ranitidine, ritonavir, sertraline, telithromycin, verapamil, vemurafenib | not known                                                                                      |

|                      |                                                                                                                                                                                                                                                                                                                                                                                                                                                      |                                                                                                                                                                                      |                                                                                                                                                                                                                                                                                                                                                                                                                                                                                                                                                                                                                                                                                                                                                                                                                                                                                              |                                                                                                                                                                                                                                                                                           |
|----------------------|------------------------------------------------------------------------------------------------------------------------------------------------------------------------------------------------------------------------------------------------------------------------------------------------------------------------------------------------------------------------------------------------------------------------------------------------------|--------------------------------------------------------------------------------------------------------------------------------------------------------------------------------------|----------------------------------------------------------------------------------------------------------------------------------------------------------------------------------------------------------------------------------------------------------------------------------------------------------------------------------------------------------------------------------------------------------------------------------------------------------------------------------------------------------------------------------------------------------------------------------------------------------------------------------------------------------------------------------------------------------------------------------------------------------------------------------------------------------------------------------------------------------------------------------------------|-------------------------------------------------------------------------------------------------------------------------------------------------------------------------------------------------------------------------------------------------------------------------------------------|
| <p><b>CYP3A4</b></p> | <p><b>alfentanil</b>, aprepitant, budesonide, <b>buspirone</b>, conivaptan, darifenacin, darunavir, dasatinib, dronedarone, eletriptan, eplerenone, everolimus, felodipine, <b>indinavir</b>, fluticasone, lopinavir, lovastatin, lurasidone, <b>maraviroc</b>, <b>midazolam</b>*, nisoldipine, <b>quetiapine</b>, saquinavir, <b>sildenafil</b>, <b>simvastatin</b>, sirolimus, tolvaptan, tipranavir, <b>triazolam</b>, ticagrelor, vardenafil</p> | <p>alfentanil, astemizole, cisapride, <b>cyclosporine</b>, dihydroergotamine, ergotamine, fentanyl, pimozide, <b>quinidine</b>, <b>sirolimus</b>, <b>tacrolimus</b>, terfenadine</p> | <p><b>Strong:</b> boceprevir, <b>clarithromycin</b>*, conivaptan, indinavir, <b>itraconazole</b>*, ketoconazole*, lopinavir/ritonavir, mibefradil, nefazodone, nelfinavir, posaconazole, <b>ritonavir</b>*, saquinavir, telaprevir, <b>telithromycin</b>, voriconazole</p> <p><b>Moderate:</b> amprenavir, aprepitant, atazanavir, ciprofloxacin, crizotinib, darunavir/ritonavir, <b>diltiazem</b>, <b>erythromycin</b>, fluconazole, Amprenavir, aprepitant, atazanavir, ciprofloxacin, crizotinib, darunavir/ritonavir, diltiazem, erythromycin, fluconazole, fosamprenavir, imatinib, <b>verapamil</b></p> <p><b>Weak:</b> alprazolam, amiodarone, amlodipine, atorvastatin, bicalutamide, cilostazol, cimetidine, cyclosporine, fluoxetine, fluvoxamine, goldenseal, isoniazid, lapatinib, nilotinib, pazopanib, ranitidine, ranolazine, tipranavir/ritonavir, ticagrelor, zileuton</p> | <p><b>Strong:</b> avasimibe, <b>carbamazepine</b>, phenytoin, <b>rifampin</b>,</p> <p><b>Moderate:</b> bosentan, <b>efavirenz</b>, <b>etravirine</b>, modafinil, nafcillin</p> <p><b>Weak:</b> amprenavir, aprepitant, armodafinil, pioglitazone, prednisone, rufinamide, vemurafenib</p> |
|----------------------|------------------------------------------------------------------------------------------------------------------------------------------------------------------------------------------------------------------------------------------------------------------------------------------------------------------------------------------------------------------------------------------------------------------------------------------------------|--------------------------------------------------------------------------------------------------------------------------------------------------------------------------------------|----------------------------------------------------------------------------------------------------------------------------------------------------------------------------------------------------------------------------------------------------------------------------------------------------------------------------------------------------------------------------------------------------------------------------------------------------------------------------------------------------------------------------------------------------------------------------------------------------------------------------------------------------------------------------------------------------------------------------------------------------------------------------------------------------------------------------------------------------------------------------------------------|-------------------------------------------------------------------------------------------------------------------------------------------------------------------------------------------------------------------------------------------------------------------------------------------|

<sup>a</sup> NTI= Narrow Therapeutic Index. Drugs in bold are listed in Tables 3-7. Drugs in italic are listed only in EMA guidance. \* indicates that drugs are listed in both guidance.

**Supplemental Table 2: In vivo substrates, inhibitors, and inducers for selected transporters from the FDA and EMA drug-interaction guidance**

| Transporters   | Substrates                                                                                                                                                                                                                                                                      | Inhibitors                                                                                                                                                                                                                                                       | Inducers                                                                                    |
|----------------|---------------------------------------------------------------------------------------------------------------------------------------------------------------------------------------------------------------------------------------------------------------------------------|------------------------------------------------------------------------------------------------------------------------------------------------------------------------------------------------------------------------------------------------------------------|---------------------------------------------------------------------------------------------|
| <b>P-gp</b>    | aliskiren, ambrisentan, colchicine, dabigatran etexilate, digoxin, everolimus, fexofenadine, imatinib, lapatinib, maraviroc, nilotinib, posaconazole, ranolazine, saxagliptin, sirolimus, sitagliptin, talinolol, tolvaptan, topotecan                                          | amiodarone, azithromycin, captopril, carvedilol, clarithromycin, conivaptan, cyclosporine, diltiazem, dronedarone, erythromycin, felodipine, itraconazole, ketoconazole, lopinavir and ritonavir, quercetin, quinidine, ranolazine, ticagrelor, <b>verapamil</b> | avasimibe, carbamazepine, phenytoin, <b>rifampin</b> , St John's wort, tipranavir/ritonavir |
| <b>BCRP</b>    | methotrexate, mitoxantrone, imatinib, irrinotecan, lapatinib, <b>rosuvastatin</b> , sulfasalazine, topotecan                                                                                                                                                                    | <b>cyclosporine</b> , elacridar (GF120918), eltrombopag, gefitinib                                                                                                                                                                                               | not known                                                                                   |
| <b>OATP1B1</b> | atrasentan, <b>atorvastatin</b> , <b>bosentan</b> , ezetimibe, <b>fluvastatin</b> , <b>glyburide</b> , SN-38 (active metabolite of irinotecan), <b>rosuvastatin</b> , simvastatin acid, pitavastatin, <b>pravastatin</b> , <b>repaglinide</b> , rifampin, valsartan, olmesartan | atazanavir, <b>cyclosporine</b> , eltrombopag, <b>gemfibrozil</b> , lopinavir, rifampin, ritonavir, saquinavir, tipranavir                                                                                                                                       | not known                                                                                   |
| <b>OATP1B3</b> | atorvastatin, <b>rosuvastatin</b> , pitavastatin, telmisartan, valsartan, olmesartan                                                                                                                                                                                            | atazanavir, <b>cyclosporine</b> , lopinavir, rifampin, ritonavir, saquinavir                                                                                                                                                                                     | not known                                                                                   |
| <b>OCT2</b>    | amantadine, amiloride, cimetidine, dopamine, famotidine, memantine, metformin, pindolol, procainamide, ranitidine, varenicline, oxaliplatin                                                                                                                                     | cimetidine, quinidine                                                                                                                                                                                                                                            | not known                                                                                   |
| <b>OAT1</b>    | adefovir, captopril, furosemide, lamivudine, methotrexate, oseltamivir, tenofovir, zalcitabine, zidovudine                                                                                                                                                                      | <b>probenecid</b>                                                                                                                                                                                                                                                | not known                                                                                   |
| <b>OAT3</b>    | acyclovir, bumetanide, ciprofloxacin, famotidine, furosemide, methotrexate, zidovudine, oseltamivir acid, (the active metabolite of oseltamivir), penicillin G, <b>pravastatin</b> , rosuvastatin, sitagliptin                                                                  | <b>probenecid</b> cimetidine, diclofenac                                                                                                                                                                                                                         | not known                                                                                   |

Drugs in bold are listed in Tables 3-7. Drugs in italic are listed only in EMA guidance. \* indicates that drugs are listed in both guidance.
